# Supplementary material
Source: publisher figshare collection journal article supplement (https://acs.figshare.com/ndownloader/files/15680858)
Supplement: Supplementary file 1 [file 15680858]

## [Supplementary Material]

### Critical Review: Biogeochemical Networking of Iron, Is It Important in Constructed Wetlands for Wastewater Treatment?

Shubiao Wu<sup>†\*</sup>, Jan Vymazal<sup>‡</sup>, Hans Brix<sup>§</sup>

<sup>†</sup> Aarhus Institute of Advanced Studies, Aarhus University, Høegh-Guldbergs Gade 6B, DK-8000 Aarhus C, Denmark

<sup>‡</sup> Faculty of Environmental Sciences, Czech University of Life Sciences Prague, Kymýcká 129, 165 21 Praha 6, Czech Republic

<sup>§</sup> Department of Bioscience, Aarhus University, Aarhus 8000C, Denmark

\*Corresponding author. E-mail address: wushubiao@gmail.com

#### Content of this file:

Pages: 8

Figures: 2 (Figure S1, S2)

Tables: 2 (Table S1, S2)

References

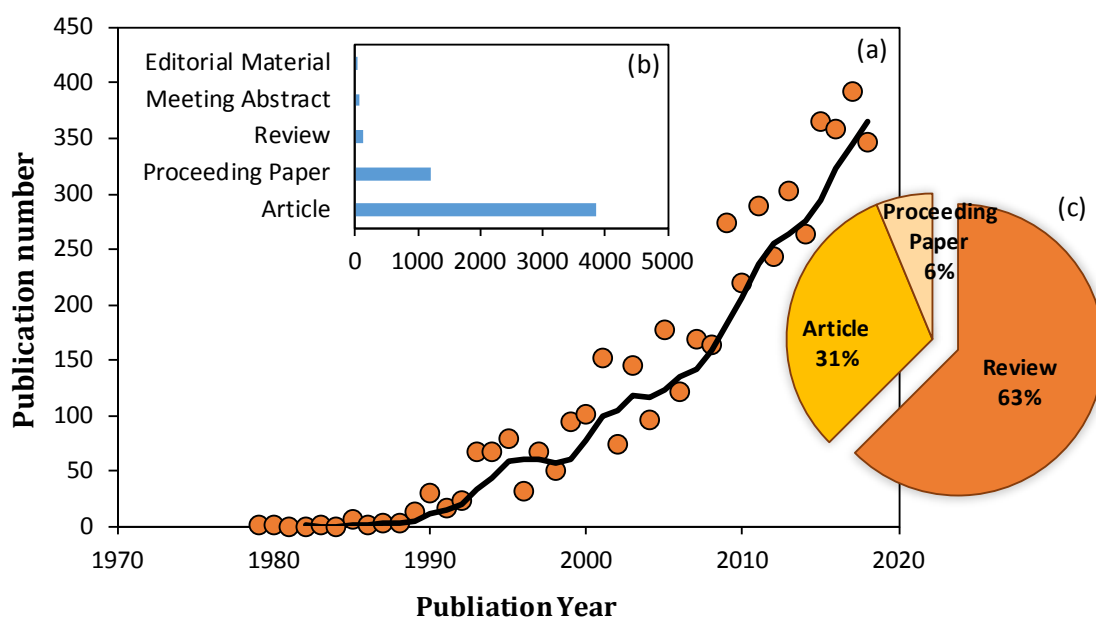

Figure S1 Publication record in the timespan of 1900-2018 in the Web of Science Core Collection by searching for “TITLE: (constructed wetlands) OR TITLE: (treatment wetlands)”. (a) Yearly publication record; (b) Document types; (c) Distribution of highly cited papers in field.

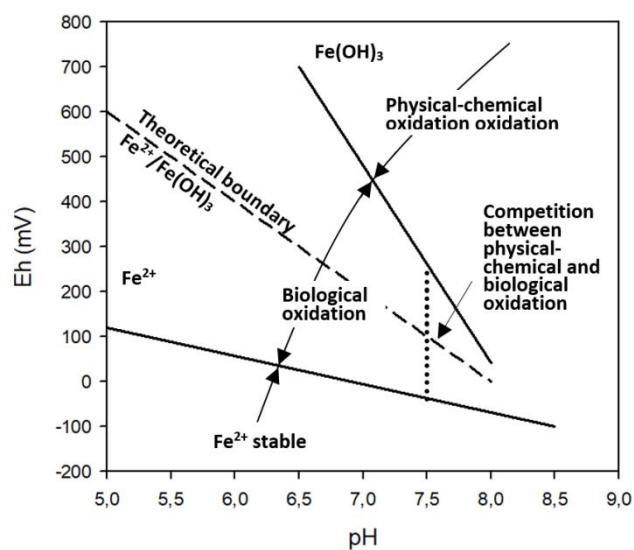

**Figure S2 Field of activity of iron bacteria as defined by thermodynamic analysis of the electrochemical equilibria (adapted from Mouchet (1992))**

**Table S1. Content of Fe in various wastewaters**

| Wastewater Type     | Fe concentration (mg/L) | Places                      | References |
|---------------------|-------------------------|-----------------------------|------------|
| Municipal sewage    | 0.930±1.140             | Morina, Czech Republic      | 1          |
|                     | 2.417±2.860             | Brehov, Czech Republic      | 1          |
|                     | 0.980±0.550             | Slavosovice, Czech Republic | 1          |
|                     | 2.2-15.3                | Kotowice, Poland            | 2          |
|                     | 0.28-5.2                | Kostrzyca, Poland           | 2          |
|                     | 1.4-7.6                 | Brzezno, Poland             | 2          |
|                     | 0.43-0.76               | Flanders, Belgium           | 3          |
| Agricultural runoff | <0.02                   | Canada                      | 4          |
|                     | 0.038-1.69              | Florida, USA                | 5          |
|                     | 0.17                    | Arkansa, USA                | 6          |

|                         |            |                            |    |
|-------------------------|------------|----------------------------|----|
| Golf course effluent    | 0.75-1.49  | Purdue, USA                | 7  |
| Highway runoff          | 0.032-3.31 | California, USA            | 8  |
|                         | 13.2-60.2  | Osaka, Japan               | 9  |
|                         | 9.8-57.9   | Stockholm, Sweden          | 10 |
| Oil refinery wastewater | 4-7.5      | Rawalpindi, Pakistan       | 11 |
|                         | 1.4        | India                      | 12 |
|                         | 0.33-11.7  | Ruwais, UAE                | 13 |
| Tannery wastewater      | 3.12       | Rouiba, Algiers            | 14 |
|                         | 20         | Italy                      | 15 |
| Textile                 | 0.28       | Taiwan, China              | 16 |
|                         | 0.83-2.12  | Turkey                     | 17 |
|                         | 1.08-3.11  | Pakistan                   | 18 |
|                         | 0.11-0.16  | Malaysia                   | 19 |
| Landfill Leachate       | 45±31      | Esval, Norway              | 20 |
|                         | 32±35      | Bolstad, Norway            | 20 |
|                         | 16.2       | Wiltshire, UK              | 21 |
|                         | 27-116     | Sundon landfill, UK        | 21 |
|                         | 11.1       | Buckden South leachate, UK | 21 |
|                         | 16.9       | Siltshire, UK              | 21 |
| Mine drainage           | 45         | Whittle Colliery, UK       |    |
|                         | 170        | Athens, USA                | 22 |
|                         | 2.1-255.6  | Tinsukia, India            | 23 |
|                         | 6.7-650    |                            | 24 |
|                         | 229        | Korea                      | 25 |
|                         | 105-1400   | Canada                     | 26 |
|                         | 44         | Jackson, USA               | 27 |
|                         | 100        | Jackson, USA               | 28 |
|                         | 27-333     | Athens, USA                | 22 |
|                         | 205        | Jackson, USA               | 27 |
|                         | 6.5-33.6   | UK                         | 29 |
|                         | 682-45595  | Spain                      | 30 |
|                         | 278-688    | England, UK                | 31 |

**Table S2. Use of materials rich in iron as substrate in CWs**

| Materials | Description | Reference |
|-----------|-------------|-----------|
|-----------|-------------|-----------|

|                                      |                                                                                                                                                                                                                                           |                          |
|--------------------------------------|-------------------------------------------------------------------------------------------------------------------------------------------------------------------------------------------------------------------------------------------|--------------------------|
| Sponge iron                          | Sponge iron is direct reduced iron, produced from the direct reduction of iron ore to iron by a reducing gas or elemental carbon produced from natural gas or coal.                                                                       | 32, 33                   |
| Bauxite                              | Bauxite is a rock material with a relatively high aluminum content and mixed with the two iron oxides goethite and haematite.                                                                                                             | 34-37                    |
| Fly ash                              | Fly ash is a waste product from coal combustion, consisting mainly of spherical glassy particles of silica, alumina and iron oxides                                                                                                       | 38-40                    |
| Steel slag                           | Steel slag is primarily made of iron and calcium oxide, as a result of the use of fluxing agents (mainly lime) during the steelmaking process.                                                                                            | 41-44                    |
| Drinking water treatment residuals   | By-products from drinking water production from surface water in which Al- or Fe-rich flocculants are added to precipitate suspended solids and phytoplankton.                                                                            | 45-48                    |
| Emerging materials with iron coating | <ul style="list-style-type: none"> <li>▪ Expanded clay with iron oxide coatings;</li> <li>▪ Quartz sand with iron oxide coatings;</li> <li>▪ Sand with iron oxide coatings;</li> <li>▪ Crushed brick with iron oxide coatings.</li> </ul> | 49, 50<br>51<br>52<br>52 |

## References

1. Kröpfelová, L.; Vymazal, J.; Švehla, J.; Štíchová, J., Removal of trace elements in three horizontal sub-surface flow constructed wetlands in the Czech Republic. *Environmental Pollution* **2009**, *157*, (4), 1186-1194.
2. Samecka-Cymerman, A.; Stepień, D.; Kempers, A. J., Efficiency in Removing Pollutants by Constructed Wetland Purification Systems in Poland. *Journal of Toxicology and Environmental Health, Part A* **2004**, *67*, (4), 265-275.
3. Lesage, E.; Rousseau, D. P. L.; Meers, E.; Tack, F. M. G.; De Pauw, N., Accumulation of metals in a horizontal subsurface flow constructed wetland treating domestic wastewater in Flanders, Belgium. *Science of The Total Environment* **2007**, *380*, (1), 102-115.
4. Blowes, D.; Robertson, W.; Ptacek, C.; Merkley, C., Removal of agricultural nitrate from tile-drainage effluent water using in-line bioreactors. *Journal of Contaminant Hydrology* **1994**, *15*, (3), 207-221.
5. He, Z. L.; Zhang, M. K.; Calvert, D. V.; Stoffella, P. J.; Yang, X. E.; Yu, S., Transport of Heavy Metals in Surface Runoff from Vegetable and Citrus Fields. *Soil Science Society of America Journal* **2004**, *68*, (5), 1662-1669.
6. Edwards, D. R.; Moore Jr, P.; Daniel, T. C.; Srivastava, P.; Nichols, D., Vegetative filter strip removal of metals in runoff from poultry litter-amended fescuegrass plots. *Transactions of the ASAE* **1997**, *40*, (1), 121-127.
7. Kohler, E. A.; Poole, V. L.; Reicher, Z. J.; Turco, R. F., Nutrient, metal, and pesticide removal during storm and nonstorm events by a constructed wetland on an urban golf course. *Ecol. Eng.* **2004**, *23*, (4), 285-298.
8. Kayhanian, M.; Suverkropp, C.; Ruby, A.; Tsay, K., Characterization and prediction of highway runoff constituent event mean concentration. *Journal of Environmental Management* **2007**, *85*, (2), 279-295.
9. Shinya, M.; Tsuchinaga, T.; Kitano, M.; Yamada, Y.; Ishikawa, M., Characterization of heavy metals and polycyclic aromatic hydrocarbons in urban highway runoff. *Water Science and Technology* **2000**, *42*, (7-8), 201-208.
10. Hallberg, M.; Renman, G.; Lundbom, T., Seasonal Variations of Ten Metals in Highway Runoff and their Partition between Dissolved and Particulate Matter. *Water, Air, and Soil Pollution* **2007**, *181*, (1), 183-191.

11. Aslam, M. M.; Malik, M.; Baig, M. A.; Qazi, I. A.; Iqbal, J., Treatment performances of compost-based and gravel-based vertical flow wetlands operated identically for refinery wastewater treatment in Pakistan. *Ecol. Eng.* **2007**, *30*, (1), 34-42.
12. Pandey, R. A.; Sanyal, P. B.; Chattopadhyay, N.; Kaul, S. N., Treatment and reuse of wastes of a vegetable oil refinery. *Resources, Conservation and Recycling* **2003**, *37*, (2), 101-117.
13. Benyahia, F.; Abdulkarim, M.; Embaby, A.; Rao, M. In *Refinery wastewater treatment: a true technological challenge*, The Seventh Annual UAE University Research Conference. UAE University, 2006; 2006.
14. Benhadji, A.; Taleb Ahmed, M.; Maachi, R., Electrocoagulation and effect of cathode materials on the removal of pollutants from tannery wastewater of Rouiba. *Desalination* **2011**, *277*, (1), 128-134.
15. Szpyrkowicz, L.; Kaul, S. N., Biochemical removal of nitrogen from tannery wastewater: performance and stability of a full-scale plant. *Journal of Chemical Technology & Biotechnology: International Research in Process, Environmental & Clean Technology* **2004**, *79*, (8), 879-888.
16. Lin, S. H.; Chen, M. L., Treatment of textile wastewater by chemical methods for reuse. *Water Research* **1997**, *31*, (4), 868-876.
17. Kapdan, I. K.; Alparslan, S., Application of anaerobic-aerobic sequential treatment system to real textile wastewater for color and COD removal. *Enzyme and Microbial Technology* **2005**, *36*, (2), 273-279.
18. Imtiazuddin, S.; Mumtaz, M.; Mallick, K. A., Pollutants of wastewater characteristics in textile industries. *J Basic Appl Sci* **2012**, *8*, 554-556.
19. Lim, S.-L.; Chu, W.-L.; Phang, S.-M., Use of *Chlorella vulgaris* for bioremediation of textile wastewater. *Bioresource Technology* **2010**, *101*, (19), 7314-7322.
20. Mæhlum, T.; Warner, W. S.; Stålnacke, P.; Jenssen, P. D., Leachate treatment in extended aeration lagoons and constructed wetlands in Norway. In *Constructed Wetlands for the Treatment of Landfill Leachates*, Mulamootil, G., McBean, E.A., Revers, F. (Eds.), Ed. CRC Press: Boca Raton, FL: 1999; pp 151-163.
21. Barr, M.; Robinson, H., Constructed wetlands for landfill leachate treatment. *Waste management & research* **1999**, *17*, (6), 498-504.
22. Mitsch, W. J.; Wise, K. M., Water quality, fate of metals, and predictive model validation of a constructed wetland treating acid mine drainage. *Water Research* **1998**, *32*, (6), 1888-1900.
23. Equeenuddin, S. M.; Tripathy, S.; Sahoo, P. K.; Panigrahi, M. K., Hydrogeochemical characteristics of acid mine drainage and water pollution at Makum Coalfield, India. *Journal of Geochemical Exploration* **2010**, *105*, (3), 75-82.
24. Johnson, D. B., Chemical and Microbiological Characteristics of Mineral Spoils and Drainage Waters at Abandoned Coal and Metal Mines. *Water, Air and Soil Pollution: Focus* **2003**, *3*, (1), 47-66.
25. Chon, H.-T.; Hwang, J.-H., Geochemical Characteristics of the Acid Mine Drainage in the Water System in the Vicinity of the Dogye Coal Mine in Korea. *Environmental Geochemistry and Health* **2000**, *22*, (2), 155-172.
26. Waybrant, K.; Blowes, D.; Ptacek, C., Selection of reactive mixtures for use in permeable reactive walls for treatment of mine drainage. *Environmental Science & Technology* **1998**, *32*, (13), 1972-1979.
27. Mays, P. A.; Edwards, G. S., Comparison of heavy metal accumulation in a natural wetland and constructed wetlands receiving acid mine drainage. *Ecol. Eng.* **2001**, *16*, (4), 487-500.
28. Ye, Z. H.; Whiting, S. N.; Qian, J. H.; Lytle, C. M.; Lin, Z.-Q.; Terry, N., Trace Element Removal from Coal Ash Leachate by a 10-Year-Old Constructed Wetland Z.H. Ye, present address: Institute for Natural Resource and Environmental Management, Hong Kong Baptist Univ., Hong Kong. *Journal of Environmental Quality* **2001**, *30*, (5), 1710-1719.
29. Kusin, F. M.; Jarvis, A. P.; Gandy, C. J., Hydraulic performance and iron removal in wetlands and lagoons treating ferruginous coal mine waters. *Wetlands* **2014**, *34*, (3), 555-564.
30. Hubbard, C. G.; Black, S.; Coleman, M. L., Aqueous geochemistry and oxygen isotope compositions of acid mine drainage from the Río Tinto, SW Spain, highlight inconsistencies in current models. *Chemical Geology* **2009**, *265*, (3-4), 321-334.

31. Jarvis, A.; Moustafa, M.; Orme, P.; Younger, P., Effective remediation of grossly polluted acidic, and metal-rich, spoil heap drainage using a novel, low-cost, permeable reactive barrier in Northumberland, UK. *Environmental Pollution* **2006**, *143*, (2), 261-268.
32. Jiang, C.; Jia, L.; He, Y.; Zhang, B.; Kirumba, G.; Xie, J., Adsorptive removal of phosphorus from aqueous solution using sponge iron and zeolite. *Journal of Colloid and Interface Science* **2013**, *402*, 246-252.
33. Ballantine, D. J.; Tanner, C. C., Substrate and filter materials to enhance phosphorus removal in constructed wetlands treating diffuse farm runoff: a review. *New Zealand Journal of Agricultural Research* **2010**, *53*, (1), 71-95.
34. Drizo, A.; Frost, C.; Grace, J.; Smith, K., Physico-chemical screening of phosphate-removing substrates for use in constructed wetland systems. *Water Research* **1999**, *33*, (17), 3595-3602.
35. Stefanakis, A. I.; Tsihrintzis, V. A., Use of zeolite and bauxite as filter media treating the effluent of Vertical Flow Constructed Wetlands. *Microporous and Mesoporous Materials* **2012**, *155*, 106-116.
36. Wood, R.; McAtamney, C., Constructed wetlands for waste water treatment: the use of laterite in the bed medium in phosphorus and heavy metal removal. *Hydrobiologia* **1996**, *340*, (1-3), 323-331.
37. Stefanakis, A. I.; Tsihrintzis, V. A., Performance of pilot-scale vertical flow constructed wetlands treating simulated municipal wastewater: effect of various design parameters. *Desalination* **2009**, *248*, (1-3), 753-770.
38. Drizo, A.; Frost, C. A.; Grace, J.; Smith, K. A., Physico-chemical screening of phosphate-removing substrates for use in constructed wetland systems. *Water Research* **1999**, *33*, (17), 3595-3602.
39. Mann, R.; Bavor, H., Phosphorus removal in constructed wetlands using gravel and industrial waste substrata. *Water Science and Technology* **1993**, *27*, (1), 107-113.
40. Xu, D.; Xu, J.; Wu, J.; Muhammad, A., Studies on the phosphorus sorption capacity of substrates used in constructed wetland systems. *Chemosphere* **2006**, *63*, (2), 344-352.
41. Barca, C.; Gérente, C.; Meyer, D.; Chazarenc, F.; Andrès, Y., Phosphate removal from synthetic and real wastewater using steel slags produced in Europe. *Water Research* **2012**, *46*, (7), 2376-2384.
42. Barca, C.; Troesch, S.; Meyer, D.; Drissen, P.; Andres, Y.; Chazarenc, F., Steel slag filters to upgrade phosphorus removal in constructed wetlands: two years of field experiments. *Environmental Science & Technology* **2012**, *47*, (1), 549-556.
43. Claveau-Mallet, D.; Wallace, S.; Comeau, Y., Removal of phosphorus, fluoride and metals from a gypsum mining leachate using steel slag filters. *Water Research* **2013**, *47*, (4), 1512-1520.
44. Postila, H.; Karjalainen, S. M.; Kløve, B., Can limestone, steel slag or man-made sorption materials be used to enhance phosphate-phosphorus retention in treatment wetland for peat extraction runoff with low phosphorous concentration? *Ecol. Eng.* **2017**, *98*, 403-409.
45. Jørgensen, C. A.; Jensen, H. S.; Egemose, S., Phosphate adsorption to iron sludge from waterworks, ochre precipitation basins and commercial ferrihydrite at ambient freshwater phosphate concentrations. *Environmental Technology* **2017**, *38*, (17), 2185-2192.
46. Babatunde, A.; Zhao, Y., Forms, patterns and extractability of phosphorus retained in alum sludge used as substrate in laboratory-scale constructed wetland systems. *Chem. Eng. J.* **2009**, *152*, (1), 8-13.
47. Zhao, Y.; Babatunde, A.; Hu, Y.; Kumar, J.; Zhao, X., Pilot field-scale demonstration of a novel alum sludge-based constructed wetland system for enhanced wastewater treatment. *Process Biochemistry* **2011**, *46*, (1), 278-283.
48. Bai, L.; Wang, C.; Huang, C.; He, L.; Pei, Y., Reuse of drinking water treatment residuals as a substrate in constructed wetlands for sewage tertiary treatment. *Ecol. Eng.* **2014**, *70*, 295-303.
49. Yaghi, N.; Hartikainen, H., Enhancement of phosphorus sorption onto light expanded clay aggregates by means of aluminum and iron oxide coatings. *Chemosphere* **2013**, *93*, (9), 1879-1886.
50. Zhu, T.; Jenssen, P.; Maehlum, T.; Krogstad, T., Phosphorus sorption and chemical characteristics of lightweight aggregates (LWA)-potential filter media in treatment wetlands. *Water Science and technology* **1997**, *35*, (5), 103-108.

51. Arias, M.; Da Silva-Carballal, J.; García-Río, L.; Mejuto, J.; Nunez, A., Retention of phosphorus by iron and aluminum-oxides-coated quartz particles. *Journal of Colloid and Interface Science* **2006**, 295, (1), 65-70.
52. Boujelben, N.; Bouzid, J.; Elouear, Z.; Feki, M.; Jamoussi, F.; Montiel, A., Phosphorus removal from aqueous solution using iron coated natural and engineered sorbents. *Journal of Hazardous Materials* **2008**, 151, (1), 103-110.
